# Supplementary material for: Perinatal exposure to diets with different n-6:n-3 fatty acid ratios affects olfactory tissue fatty acid composition
Source: PubMed Central journal article supplement (PMC7329853; doi:10.1038/s41598-020-67725-9), 2020-07-01
Supplement: 41598_2020_67725_MOESM1_ESM.pdf [file 41598_2020_67725_MOESM1_ESM.pdf]

## **SUPPLEMENTARY INFORMATION**

### **TITLE**

Perinatal exposure to diets with different n-6:n-3 fatty acid ratios affects olfactory tissue fatty acid composition

### **AUTHORS**

Spiro Khoury, Vanessa Soubeyre, Stéphanie Cabaret, Laetitia Merle, Stéphane Grégoire, Nicolas Deprêtre, David Jarriault, Xavier Grosmaître, Lionel Bretillon, Olivier Berdeaux, Niyazi Acar, Anne Marie Le Bon\*

Centre des Sciences du Goût et de l'Alimentation, AgroSup Dijon, CNRS, INRAE, Université Bourgogne Franche-Comté, F-21000 Dijon, France.

**Table S1:** Concentrations of individual molecular species of PC and PlsC in the offspring olfactory mucosa (% of total PC + PlsC). Data are expressed as the mean  $\pm$  s.e.m. (n= 6 mice/group). \*: Values are significantly different from the control group CON (Mann-Whitney U test; p < 0.05).

| Molecular species | PC/PlsC species (sum composition) | Ion precursor m/z 184 [M+H] <sup>+</sup> | CON          |      | LOW           |      | HIGH         |      |
|-------------------|-----------------------------------|------------------------------------------|--------------|------|---------------|------|--------------|------|
|                   |                                   |                                          | mean         | sem  | mean          | sem  | mean         | sem  |
| PC(15:0/14:0)     | PC 29:0                           | 692.5                                    | <b>0.07</b>  | 0.01 | <b>0.06</b>   | 0.01 | <b>0.05</b>  | 0.01 |
| PC(16:0/14:1)     | PC 30:1                           | 704.5                                    | <b>0.11</b>  | 0.01 | <b>0.11</b>   | 0.01 | <b>0.10</b>  | 0.01 |
| PC(16:0/14:0)     | PC 30:0                           | 706.5                                    | <b>1.64</b>  | 0.06 | <b>1.59</b>   | 0.10 | <b>1.45</b>  | 0.11 |
| PC(15:1/16:0)     | PC 31:1                           | 718.5                                    | <b>0.20</b>  | 0.01 | <b>0.20</b>   | 0.02 | <b>0.18</b>  | 0.01 |
| PC(16:0p/16:0)    | PlsC 32:0                         | 718.5                                    | <b>0.20</b>  | 0.01 | <b>0.20</b>   | 0.02 | <b>0.18</b>  | 0.01 |
| PC(15:0/16:0)     | PC 31:0                           | 720.5                                    | <b>0.31</b>  | 0.02 | <b>0.34</b>   | 0.03 | <b>0.31</b>  | 0.03 |
| PC(14:0/18:2)     | PC 32:2                           | 730.5                                    | <b>0.25</b>  | 0.02 | <b>0.27</b>   | 0.02 | <b>0.25</b>  | 0.03 |
| PC(16:0/16:1)     | PC 32:1                           | 732.5                                    | <b>2.99</b>  | 0.08 | <b>2.98</b>   | 0.13 | <b>2.86</b>  | 0.08 |
| PC(16:0/16:0)     | PC 32:0                           | 734.6                                    | <b>13.57</b> | 0.74 | <b>13.43</b>  | 0.53 | <b>14.13</b> | 0.61 |
| PC(16:0p/18:1)    | PlsC 34:1                         | 744.6                                    | <b>0.24</b>  | 0.01 | <b>0.25</b>   | 0.02 | <b>0.20</b>  | 0.02 |
| PC(17:1/16:0)     | PC 33:1                           | 746.6                                    | <b>0.61</b>  | 0.04 | <b>0.56</b>   | 0.02 | <b>0.58</b>  | 0.02 |
| PC(16:0p/18:0)    | PlsC 34:0                         | 746.6                                    | <b>0.61</b>  | 0.04 | <b>0.56</b>   | 0.02 | <b>0.58</b>  | 0.02 |
| PC(14:0/20:4)     | PC 34:4                           | 754.5                                    | <b>0.22</b>  | 0.01 | <b>0.28</b>   | 0.02 | <b>0.18</b>  | 0.02 |
| PC(16:1/18:2)     | PC 34:3                           | 756.5                                    | <b>0.46</b>  | 0.03 | <b>0.32*</b>  | 0.02 | <b>0.39</b>  | 0.04 |
| PC(16:0/18:2)     | PC 34:2                           | 758.6                                    | <b>6.56</b>  | 0.50 | <b>4.89*</b>  | 0.36 | <b>6.60</b>  | 0.66 |
| PC(16:0/18:1)     | PC 34:1                           | 760.6                                    | <b>23.60</b> | 0.72 | <b>21.91</b>  | 0.72 | <b>23.03</b> | 0.47 |
| PC(16:0p/20:4)    | PlsC 36:4                         | 766.6                                    | <b>0.54</b>  | 0.03 | <b>0.65</b>   | 0.04 | <b>0.59</b>  | 0.05 |
| PC(15:0/20:4)     | PC 35:4                           | 768.5                                    | <b>0.36</b>  | 0.03 | <b>0.42</b>   | 0.02 | <b>0.22*</b> | 0.03 |
| PC(17:0/18:1)     | PC 35:1                           | 774.6                                    | <b>0.32</b>  | 0.02 | <b>0.24*</b>  | 0.02 | <b>0.31</b>  | 0.02 |
| PC(14:0/22:6)     | PC 36:6                           | 778.5                                    | <b>0.15</b>  | 0.02 | <b>0.07*</b>  | 0.01 | <b>0.20</b>  | 0.03 |
| PC(16:0/20:5)     | PC 36:5                           | 780.5                                    | <b>0.77</b>  | 0.05 | <b>0.38*</b>  | 0.04 | <b>1.88*</b> | 0.20 |
| PC(16:0/20:4)     | PC 36:4                           | 782.6                                    | <b>8.68</b>  | 0.34 | <b>11.92*</b> | 0.59 | <b>7.29*</b> | 0.28 |
| PC(16:0/20:3)     | PC 36:3                           | 784.6                                    | <b>3.11</b>  | 0.15 | <b>2.92</b>   | 0.18 | <b>3.17</b>  | 0.17 |
| PC(18:1/18:1)     | PC 36:2                           | 786.6                                    | <b>6.09</b>  | 0.23 | <b>5.19*</b>  | 0.12 | <b>5.92</b>  | 0.22 |
| PC(18:0/18:2)     | PC 36:2                           | 786.6                                    | <b>6.09</b>  | 0.23 | <b>5.19*</b>  | 0.12 | <b>5.92</b>  | 0.22 |
| PC(18:0/18:1)     | PC 36:1                           | 788.6                                    | <b>5.88</b>  | 0.17 | <b>5.03*</b>  | 0.15 | <b>5.99</b>  | 0.41 |
| PC(16:0p/22:6)    | PlsC 38:6                         | 790.6                                    | <b>0.35</b>  | 0.04 | <b>0.21</b>   | 0.07 | <b>0.42</b>  | 0.07 |
| PC(15:0/22:6)     | PC 37:6                           | 792.5                                    | <b>0.25</b>  | 0.05 | <b>0.28</b>   | 0.01 | <b>0.28</b>  | 0.05 |
| PC(18:1p/20:4)    | PlsC 38:5                         | 792.5                                    | <b>0.25</b>  | 0.05 | <b>0.28</b>   | 0.01 | <b>0.28</b>  | 0.05 |
| PC(18:0p/20:4)    | PlsC 38:4                         | 794.6                                    | <b>0.27</b>  | 0.04 | <b>0.44*</b>  | 0.04 | <b>0.23</b>  | 0.03 |
| PC(16:1/22:6)     | PC 38:7                           | 804.5                                    | <b>0.19</b>  | 0.02 | <b>0.10*</b>  | 0.02 | <b>0.23</b>  | 0.02 |
| PC(16:0/22:6)     | PC 38:6                           | 806.6                                    | <b>5.66</b>  | 0.44 | <b>2.37*</b>  | 0.27 | <b>7.05</b>  | 0.70 |
| PC(16:0/22:5)     | PC 38:5                           | 808.6                                    | <b>2.40</b>  | 0.12 | <b>4.55*</b>  | 0.18 | <b>2.72</b>  | 0.27 |
| PC(18:0/20:5)     | PC 38:5                           | 808.6                                    | <b>2.40</b>  | 0.12 | <b>4.55*</b>  | 0.18 | <b>2.72</b>  | 0.27 |
| PC(18:0/20:4)     | PC 38:4                           | 810.6                                    | <b>6.93</b>  | 0.31 | <b>11.12*</b> | 0.77 | <b>5.11*</b> | 0.41 |
| PC(18:0/20:3)     | PC 38:3                           | 812.6                                    | <b>1.86</b>  | 0.12 | <b>1.86</b>   | 0.05 | <b>1.72</b>  | 0.13 |
| PC(18:2/21:6)     | PC 38:1                           | 816.5                                    | <b>0.36</b>  | 0.04 | <b>0.28</b>   | 0.05 | <b>0.25</b>  | 0.03 |
| PC(17:0/22:6)     | PC 39:6                           | 820.6                                    | <b>0.16</b>  | 0.01 | <b>0.15</b>   | 0.02 | <b>0.17</b>  | 0.02 |
| PC(20:4/20:4)     | PC 40:8                           | 830.6                                    | <b>0.15</b>  | 0.02 | <b>0.10*</b>  | 0.01 | <b>0.16</b>  | 0.02 |
| PC(18:1/22:6)     | PC 40:7                           | 832.6                                    | <b>1.08</b>  | 0.10 | <b>0.54*</b>  | 0.06 | <b>1.44*</b> | 0.11 |
| PC(18:1/22:5)     | PC 40:6                           | 834.6                                    | <b>2.59</b>  | 0.17 | <b>1.80*</b>  | 0.17 | <b>3.34*</b> | 0.20 |
| PC(18:0/22:5)     | PC 40:5                           | 836.6                                    | <b>0.49</b>  | 0.05 | <b>1.38*</b>  | 0.13 | <b>0.47</b>  | 0.05 |
| PC(18:0/22:4)     | PC 40:4                           | 838.6                                    | <b>0.30</b>  | 0.03 | <b>0.55*</b>  | 0.05 | <b>0.21*</b> | 0.02 |
| PC(20:4/22:6)     | PC 42:10                          | 854.6                                    | <b>0.04</b>  | 0.01 | <b>0.02</b>   | 0.01 | <b>0.05</b>  | 0.01 |
| PC(22:4/20:4)     | PC 42:8                           | 858.6                                    | <b>0.06</b>  | 0.01 | <b>0.09</b>   | 0.02 | <b>0.07</b>  | 0.01 |
| PC(20:2/22:5)     | PC 42:7                           | 860.6                                    | <b>0.06</b>  | 0.01 | <b>0.07</b>   | 0.01 | <b>0.06</b>  | 0.01 |
| PC(20:1/22:5)     | PC 42:6                           | 862.6                                    | <b>0.05</b>  | 0.01 | <b>0.04</b>   | 0.01 | <b>0.06</b>  | 0.01 |
| PC(22:6/22:6)     | PC 44:12                          | 878.6                                    | <b>0.03</b>  | 0.01 | <b>0.01*</b>  | 0.01 | <b>0.04</b>  | 0.01 |
| PC(22:5/22:6)     | PC44:11                           | 880.6                                    | <b>0.00</b>  | 0.00 | <b>0.02*</b>  | 0.01 | <b>0.02</b>  | 0.01 |

**Table S2:** Concentrations of individual molecular species of PE and PlsE in the offspring olfactory mucosa (% of total PE + PlsE). Data are expressed as the mean  $\pm$  s.e.m. (n= 6 mice/group). \*: Values are significantly different from the control group CON (Mann-Whitney U test; p < 0.05).

| Molecular species | PE/PlsE species (sum composition) | PE: neutral loss m/z 141<br>PlsE: MRM transition | CON           |         | LOW           |             | HIGH          |             |
|-------------------|-----------------------------------|--------------------------------------------------|---------------|---------|---------------|-------------|---------------|-------------|
|                   |                                   |                                                  | mean          | sem     | mean          | sem         | mean          | sem         |
|                   |                                   |                                                  | PE(18:1/14:1) | PE 32:2 | 688.5         | <b>0.03</b> | 0.03          | <b>0.02</b> |
| PE(16:0/16:1)     | PE 32:1                           | 690.5                                            | <b>0.23</b>   | 0.06    | <b>0.19</b>   | 0.05        | <b>0.25</b>   | 0.06        |
| PE(16:0/16:0)     | PE 32:0                           | 692.5                                            | <b>0.18</b>   | 0.07    | <b>0.22</b>   | 0.05        | <b>0.17</b>   | 0.04        |
| PE(16:1/18:2)     | PE 34:3                           | 714.5                                            | <b>0.21</b>   | 0.14    | <b>0.09*</b>  | 0.02        | <b>0.19</b>   | 0.10        |
| PE(16:0/18:2)     | PE 34:2                           | 716.5                                            | <b>1.83</b>   | 0.44    | <b>1.22*</b>  | 0.19        | <b>2.24</b>   | 0.46        |
| PE(16:0/18:1)     | PE 34:1                           | 718.5                                            | <b>4.26</b>   | 0.56    | <b>3.12*</b>  | 0.26        | <b>4.17</b>   | 0.77        |
| PE(16:0/20:5)     | PE 36:5                           | 738.5                                            | <b>0.64</b>   | 0.13    | <b>0.41</b>   | 0.17        | <b>1.20*</b>  | 0.13        |
| PE(16:0/20:4)     | PE 36:4                           | 740.5                                            | <b>7.31</b>   | 0.25    | <b>8.45*</b>  | 0.60        | <b>6.26*</b>  | 0.63        |
| PE(18:2/18:2)     | PE 36:3                           | 742.5                                            | <b>2.16</b>   | 0.42    | <b>1.49*</b>  | 0.50        | <b>2.21</b>   | 0.86        |
| PE(18:1/18:1)     | PE 36:2                           | 744.6                                            | <b>6.46</b>   | 1.42    | <b>4.14*</b>  | 0.74        | <b>5.97</b>   | 1.03        |
| PE(18:0/18:1)     | PE 36:1                           | 746.6                                            | <b>3.36</b>   | 0.55    | <b>2.44*</b>  | 0.39        | <b>3.44</b>   | 0.56        |
| PE(20:0/16:0)     | PE 36:0                           | 748.6                                            | <b>0.45</b>   | 0.18    | <b>0.29</b>   | 0.12        | <b>0.69</b>   | 0.29        |
| PE(16:1/22:6)     | PE 38:7                           | 762.5                                            | <b>0.59</b>   | 0.11    | <b>0.41*</b>  | 0.09        | <b>0.61</b>   | 0.20        |
| PE(16:0/22:6)     | PE 38:6                           | 764.5                                            | <b>14.76</b>  | 1.53    | <b>6.46*</b>  | 0.67        | <b>17.83</b>  | 2.70        |
| PE(18:1/20:4)     | PE38:5                            | 766.5                                            | <b>6.35</b>   | 0.34    | <b>12.37*</b> | 0.38        | <b>5.73</b>   | 0.59        |
| PE(18:0/20:4)     | PE 38:4                           | 768.6                                            | <b>23.24</b>  | 1.01    | <b>28.38*</b> | 1.33        | <b>20.33*</b> | 1.30        |
| PE(18:1/20:2)     | PE 38:3                           | 770.6                                            | <b>1.36</b>   | 0.28    | <b>1.29</b>   | 0.47        | <b>1.34</b>   | 0.28        |
| PE(18:0/20:1)     | PE 38:1                           | 774.6                                            | <b>0.19</b>   | 0.10    | <b>0.13</b>   | 0.06        | <b>0.26</b>   | 0.11        |
| PE(18:2/22:6)     | PE 40:8                           | 788.5                                            | <b>0.46</b>   | 0.17    | <b>0.42</b>   | 0.11        | <b>0.60</b>   | 0.07        |
| PE(18:1/22:6)     | PE 40:7                           | 790.5                                            | <b>4.20</b>   | 0.31    | <b>2.35*</b>  | 0.23        | <b>4.73*</b>  | 0.19        |
| PE(18:0/22:6)     | PE 40:6                           | 792.6                                            | <b>8.77</b>   | 0.80    | <b>5.57*</b>  | 0.37        | <b>11.14*</b> | 0.68        |
| PE(18:0/22:5)     | PE 40:5                           | 794.6                                            | <b>1.80</b>   | 0.44    | <b>5.18*</b>  | 0.40        | <b>1.35*</b>  | 0.24        |
| PE(18:0/22:4)     | PE 40:4                           | 796.6                                            | <b>1.75</b>   | 0.25    | <b>2.75*</b>  | 0.33        | <b>1.06*</b>  | 0.18        |
| PE(20:1/22:5)     | PE 42:6                           | 820.6                                            | <b>0.09</b>   | 0.07    | <b>0.17</b>   | 0.08        | <b>0.09</b>   | 0.03        |
| PE(16:0p/20:4)    | 160p/20:4                         | 722 ->303                                        | <b>3.31</b>   | 0.38    | <b>4.88*</b>  | 0.18        | <b>2.74*</b>  | 0.21        |
| PE(16:0p/20:3)    | 160p/20:3                         | 724 ->305                                        | <b>0.22</b>   | 0.02    | <b>0.31*</b>  | 0.02        | <b>0.16*</b>  | 0.01        |
| PE(16:0p/22:6)    | 160p/22:6                         | 746 ->327                                        | <b>1.36</b>   | 0.26    | <b>0.69*</b>  | 0.05        | <b>1.55</b>   | 0.15        |
| PE(18:1p/20:4)    | 181p/20:4                         | 748 -> 303                                       | <b>0.98</b>   | 0.15    | <b>1.36*</b>  | 0.06        | <b>0.72*</b>  | 0.05        |
| PE(16:0p/22:5)    | 160p/22:5                         | 748 -> 329                                       | <b>0.40</b>   | 0.05    | <b>1.14*</b>  | 0.07        | <b>0.36</b>   | 0.16        |
| PE(18:0p/20:4)    | 180p/20:4                         | 750 -> 303                                       | <b>1.53</b>   | 0.14    | <b>2.04*</b>  | 0.07        | <b>1.24*</b>  | 0.11        |
| PE(16:0p/22:4)    | 160p/22:4                         | 750 -> 331                                       | <b>0.88</b>   | 0.09    | <b>1.73*</b>  | 0.10        | <b>0.54*</b>  | 0.03        |
| PE(18:1p/22:6)    | 181p/22:6                         | 772 -> 327                                       | <b>0.31</b>   | 0.05    | <b>0.15*</b>  | 0.01        | <b>0.34</b>   | 0.03        |
| PE(18:0p/22:6)    | 180p/22:6                         | 774 -> 327                                       | <b>0.34</b>   | 0.08    | <b>0.16*</b>  | 0.02        | <b>0.41</b>   | 0.05        |

**Table S3:** Concentrations of individual molecular species of PI in the offspring olfactory mucosa (% of total PI). Data are expressed as the mean  $\pm$  s.e.m. (n= 6 mice/group). \*: Values are significantly different from the control group CON (Mann-Whitney U test;  $p < 0.05$ ).

| Molecular species | PI species (sum composition) | Ion precursor $m/z$ 271 (InsP-H <sub>2</sub> O) [M-H] <sup>-</sup> | CON          |      | LOW           |      | HIGH          |      |
|-------------------|------------------------------|--------------------------------------------------------------------|--------------|------|---------------|------|---------------|------|
|                   |                              |                                                                    | mean         | sem  | mean          | sem  | mean          | sem  |
| PI(16:0/14:0)     | PI 30:0                      | 781.5                                                              | <b>0.20</b>  | 0.08 | <b>0.25</b>   | 0.05 | <b>0.15</b>   | 0.04 |
| PI(16:0/16:0)     | PI 32:0                      | 809.5                                                              | <b>5.65</b>  | 0.65 | <b>5.23</b>   | 0.66 | <b>4.56</b>   | 0.50 |
| PI(16:0/18:2)     | PI 34:2                      | 833.5                                                              | <b>0.81</b>  | 0.16 | <b>0.45</b>   | 0.10 | <b>1.13</b>   | 0.22 |
| PI(16:0/18:1)     | PI 34:1                      | 835.5                                                              | <b>4.77</b>  | 0.41 | <b>3.40*</b>  | 0.43 | <b>4.27</b>   | 0.70 |
| PI(18:0/16:0)     | PI 34:0                      | 837.5                                                              | <b>4.38</b>  | 0.59 | <b>4.96</b>   | 0.50 | <b>4.55</b>   | 0.43 |
| PI(16:0/20:4)     | PI 36:4                      | 857.5                                                              | <b>9.47</b>  | 0.70 | <b>10.18</b>  | 0.30 | <b>9.11</b>   | 0.40 |
| PI(16:0/20:3)     | PI 36:3                      | 859.5                                                              | <b>1.17</b>  | 0.35 | <b>0.82</b>   | 0.26 | <b>1.00</b>   | 0.12 |
| PI(18:0/18:2)     | PI 36:2                      | 861.5                                                              | <b>1.69</b>  | 0.17 | <b>1.10*</b>  | 0.17 | <b>1.26</b>   | 0.33 |
| PI(18:0/18:1)     | PI 36:1                      | 863.6                                                              | <b>1.49</b>  | 0.23 | <b>1.11</b>   | 0.30 | <b>1.39</b>   | 0.26 |
| PI(18:0p/20:4)    | PI 38:4                      | 869.6                                                              | <b>0.25</b>  | 0.05 | <b>0.41</b>   | 0.10 | <b>0.12</b>   | 0.04 |
| PI(17:0/20:4)     | PI 37:4                      | 871.5                                                              | <b>0.37</b>  | 0.07 | <b>0.30</b>   | 0.11 | <b>0.28</b>   | 0.13 |
| PI(16:0/22:6)     | PI 38:6                      | 881.5                                                              | <b>6.91</b>  | 0.55 | <b>3.15*</b>  | 0.18 | <b>8.80</b>   | 0.77 |
| PI(16:0/22:5)     | PI 38:5                      | 883.5                                                              | <b>3.41</b>  | 0.43 | <b>4.92</b>   | 0.56 | <b>3.93</b>   | 0.49 |
| PI(18:0/20:4)     | PI 38:4                      | 885.5                                                              | <b>44.06</b> | 0.82 | <b>51.72*</b> | 0.91 | <b>39.92*</b> | 0.93 |
| PI(18:0/22:6)     | PI 40:6                      | 909.5                                                              | <b>14.01</b> | 0.81 | <b>6.25*</b>  | 0.86 | <b>18.15*</b> | 0.92 |
| PI(18:0/22:5)     | PI 40:5                      | 911.6                                                              | <b>0.51</b>  | 0.17 | <b>4.39*</b>  | 0.28 | <b>0.94</b>   | 0.34 |
| PI(18:0/22:4)     | PI 40:4                      | 913.6                                                              | <b>0.86</b>  | 0.19 | <b>1.35</b>   | 0.23 | <b>0.44</b>   | 0.17 |

**Table S4:** Concentrations of individual molecular species of PS in the offspring olfactory mucosa (% of total PS). Data are expressed as the mean  $\pm$  s.e.m. (n= 6 mice/group). \*: Values are significantly different from the control group CON (Mann-Whitney U test;  $p < 0.05$ ).

| Molecular species    | PS species (sum composition) | Neutral loss $m/z$ 185 [M+H] <sup>+</sup> | CON          |      | LOW           |      | HIGH         |      |
|----------------------|------------------------------|-------------------------------------------|--------------|------|---------------|------|--------------|------|
|                      |                              |                                           | mean         | sem  | mean          | sem  | mean         | sem  |
| <b>PS(16:0/18:1)</b> | PS 34:1                      | 762.5                                     | <b>2.60</b>  | 0.62 | <b>5.17</b>   | 2.59 | <b>3.36</b>  | 1.10 |
| <b>PS(16:0/20:4)</b> | PS 36:4                      | 784.5                                     | <b>1.20</b>  | 0.47 | <b>1.22</b>   | 0.48 | <b>1.00</b>  | 0.53 |
| <b>PS(18:0/18:2)</b> | PS 36:2                      | 788.5                                     | <b>6.61</b>  | 1.15 | <b>7.02</b>   | 1.98 | <b>6.59</b>  | 2.36 |
| <b>PS(18:1/18:1)</b> |                              |                                           |              |      |               |      |              |      |
| <b>PS(18:0/18:1)</b> | PS 36:1                      | 790.6                                     | <b>29.28</b> | 4.56 | <b>28.72</b>  | 6.75 | <b>28.00</b> | 4.17 |
| <b>PS(16:0/20:1)</b> |                              |                                           |              |      |               |      |              |      |
| <b>PS(16:0/22:6)</b> | PS 38:6                      | 808.5                                     | <b>16.54</b> | 1.88 | <b>8.29</b>   | 3.12 | <b>17.32</b> | 2.10 |
| <b>PS(16:0/22:5)</b> | PS 38:5                      | 810.5                                     | <b>2.89</b>  | 1.96 | <b>11.47*</b> | 2.12 | <b>3.68</b>  | 2.27 |
| <b>PS(18:0/20:4)</b> | PS 38:4                      | 812.5                                     | <b>15.78</b> | 1.43 | <b>20.43</b>  | 3.70 | <b>12.99</b> | 1.99 |
| <b>PS(18:1/22:6)</b> | PS 40:7                      | 834.5                                     | <b>0.57</b>  | 0.35 | <b>0.50</b>   | 0.27 | <b>1.56</b>  | 0.69 |
| <b>PS(18:0/22:6)</b> | PS 40:6                      | 836.5                                     | <b>17.46</b> | 2.82 | <b>6.59*</b>  | 1.78 | <b>20.87</b> | 3.28 |
| <b>PS(18:0/22:5)</b> | PS 40:5                      | 838.6                                     | <b>2.91</b>  | 1.07 | <b>7.61</b>   | 2.04 | <b>2.38</b>  | 1.18 |
| <b>PS(18:0/22:4)</b> | PS 40:4                      | 840.6                                     | <b>4.16</b>  | 0.54 | <b>2.97</b>   | 1.53 | <b>2.24</b>  | 1.15 |

**Table S5:** Concentrations of individual molecular species of SM in the offspring olfactory mucosa (% of total SM). Data are expressed as the mean  $\pm$  s.e.m. (n= 6 mice/group). \*: Values are significantly different from the control group CON (Mann-Whitney U test;  $p < 0.05$ ).

| Molecular species | SM species (sum composition) | Ion precursor $m/z$ 184 [M+H] <sup>+</sup> | CON          |      | LOW          |      | HIGH         |      |
|-------------------|------------------------------|--------------------------------------------|--------------|------|--------------|------|--------------|------|
|                   |                              |                                            | mean         | sem  | mean         | sem  | mean         | sem  |
| SM(d17:1/16:0)    | SM 33:1                      | 689.6                                      | <b>0.35</b>  | 0.11 | <b>0.45</b>  | 0.30 | <b>0.27</b>  | 0.08 |
| SM(d18:1/16:1)    | SM 34:2                      | 701.6                                      | <b>0.41</b>  | 0.15 | <b>0.72</b>  | 0.37 | <b>0.46</b>  | 0.06 |
| SM(d16:0/18:1)    | SM 34:1                      | 703.6                                      | <b>30.41</b> | 2.80 | <b>36.79</b> | 4.38 | <b>31.49</b> | 3.07 |
| SM(d14:0/20:0)    | SM 34:0                      | 705.6                                      | <b>2.51</b>  | 0.37 | <b>1.48</b>  | 0.53 | <b>1.22</b>  | 0.56 |
| SM(d18:1/17:0)    | SM 35:1                      | 717.6                                      | <b>0.36</b>  | 0.11 | <b>0.34</b>  | 0.12 | <b>0.46</b>  | 0.08 |
| SM(d18:2/18:0)    | SM 36:2                      | 729.6                                      | <b>0.26</b>  | 0.06 | <b>0.36</b>  | 0.08 | <b>0.26</b>  | 0.07 |
| SM(d16:0/20:1)    | SM 36:1                      | 731.6                                      | <b>13.29</b> | 0.68 | <b>13.56</b> | 0.94 | <b>13.41</b> | 0.33 |
| SM(d14:1/23:0)    | SM 37:1                      | 745.6                                      | <b>0.21</b>  | 0.04 | <b>0.16</b>  | 0.07 | <b>0.24</b>  | 0.07 |
| SM(d18:2/20:2)    | SM 38:4                      | 753.6                                      | <b>0.08</b>  | 0.03 | <b>0.09</b>  | 0.04 | <b>0.06</b>  | 0.02 |
| SM(d14:1/24:2)    | SM 38:3                      | 755.6                                      | <b>0.03</b>  | 0.01 | <b>0.06</b>  | 0.06 | <b>0.02</b>  | 0.02 |
| SM(d18:1/20:0)    | SM 38:1                      | 759.6                                      | <b>6.01</b>  | 0.43 | <b>5.58</b>  | 0.55 | <b>5.86</b>  | 0.67 |
| SM(d22:0/16:0)    | SM 38:0                      | 761.7                                      | <b>0.29</b>  | 0.13 | <b>0.57</b>  | 0.26 | <b>0.30</b>  | 0.16 |
| SM(d15:0/24:1)    | SM 39:1                      | 773.7                                      | <b>0.12</b>  | 0.02 | <b>0.22</b>  | 0.10 | <b>0.20</b>  | 0.08 |
| SM(d18:2/22:2)    | SM 40:4                      | 781.6                                      | <b>0.05</b>  | 0.01 | <b>0.08</b>  | 0.03 | <b>0.06</b>  | 0.03 |
| SM(d22:2/18:0)    | SM 40:2                      | 785.7                                      | <b>0.71</b>  | 0.10 | <b>0.71</b>  | 0.18 | <b>0.52</b>  | 0.15 |
| SM(d18:1/22:0)    | SM 40:1                      | 787.7                                      | <b>8.78</b>  | 0.62 | <b>10.01</b> | 1.16 | <b>9.53</b>  | 0.73 |
| SM(d18:1/23:1)    | SM 41:2                      | 799.7                                      | <b>0.30</b>  | 0.09 | <b>0.13</b>  | 0.07 | <b>0.24</b>  | 0.08 |
| SM(d17:1/24:0)    | SM 41:1                      | 801.7                                      | <b>0.49</b>  | 0.06 | <b>0.45</b>  | 0.12 | <b>0.70</b>  | 0.14 |
| SM(d18:1/24:4)    | SM 42:5                      | 807.6                                      | <b>0.13</b>  | 0.05 | <b>0.08</b>  | 0.04 | <b>0.11</b>  | 0.06 |
| SM(d20:0/22:4)    | SM 42:4                      | 809.7                                      | <b>0.14</b>  | 0.06 | <b>0.04</b>  | 0.02 | <b>0.02*</b> | 0.02 |
| SM(d18:1/24:2)    | SM 42:3                      | 811.7                                      | <b>2.63</b>  | 0.24 | <b>2.07</b>  | 0.48 | <b>1.82</b>  | 0.35 |
| SM(d18:1/24:1)    | SM 42:2                      | 813.7                                      | <b>20.06</b> | 2.49 | <b>17.75</b> | 2.43 | <b>19.61</b> | 1.48 |
| SM(d18:1/24:0)    |                              |                                            |              |      |              |      |              |      |
| SM(d18:0/24:1)    | SM 42:1                      | 815.7                                      | <b>12.04</b> | 0.69 | <b>8.27*</b> | 1.05 | <b>12.97</b> | 1.31 |
| SM(d16:0/26:1)    |                              |                                            |              |      |              |      |              |      |
| SM(d18:0/26:2)    | SM 44:2                      | 841.7                                      | <b>0.32</b>  | 0.09 | <b>0.04*</b> | 0.02 | <b>0.17</b>  | 0.07 |

**Table S6:** Concentrations of individual molecular species of LPC in the offspring olfactory mucosa (% of total LPC). Data are expressed as the mean  $\pm$  s.e.m. (n= 6 mice/group). \*: Values are significantly different from the control group CON (Mann-Whitney U test; p < 0.05).

| Molecular species | Ion precursor<br>m/z 184<br>[M+H] <sup>+</sup> | CON          |      | LOW          |      | HIGH         |      |
|-------------------|------------------------------------------------|--------------|------|--------------|------|--------------|------|
|                   |                                                | mean         | sem  | mean         | sem  | mean         | sem  |
| LPC(16:1)         | 494.3                                          | <b>0.37</b>  | 0.22 | <b>0.48</b>  | 0.19 | <b>1.53</b>  | 0.64 |
| LPC(16:0)         | 496.3                                          | <b>59.44</b> | 2.44 | <b>60.22</b> | 2.27 | <b>59.21</b> | 1.11 |
| LPC(18:2)         | 520.3                                          | <b>2.51</b>  | 0.68 | <b>2.46</b>  | 0.70 | <b>2.76</b>  | 0.28 |
| LPC(18:1)         | 522.4                                          | <b>10.49</b> | 1.10 | <b>9.88</b>  | 1.56 | <b>11.96</b> | 1.10 |
| LPC(18:0)         | 524.4                                          | <b>23.63</b> | 1.70 | <b>22.79</b> | 1.36 | <b>19.18</b> | 1.69 |
| LPC(20:4)         | 544.3                                          | <b>2.21</b>  | 0.63 | <b>2.71</b>  | 0.68 | <b>3.39</b>  | 0.78 |
| LPC(20:2)         | 548.4                                          | <b>0.14</b>  | 0.06 | <b>0.44</b>  | 0.12 | <b>0.06</b>  | 0.03 |
| LPC(20:1)         | 550.4                                          | <b>0.26</b>  | 0.17 | <b>0.35</b>  | 0.31 | <b>0.30</b>  | 0.14 |
| LPC(22:6)         | 568.3                                          | <b>0.95</b>  | 0.19 | <b>0.66</b>  | 0.20 | <b>1.60</b>  | 0.33 |

**Table S7:** Concentrations of individual molecular species of PC in the offspring olfactory bulb (% of total PC + PlsC). Data are expressed as the mean  $\pm$  s.e.m. (n= 6 mice/group). \*: Values are significantly different from the control group CON (Mann-Whitney U test;  $p < 0.05$ ).

| Molecular species | PC/PlsC species (sum composition) | Ion precursor m/z 184 [M+H] <sup>+</sup> | CON          |      | LOW          |      | HIGH         |      |
|-------------------|-----------------------------------|------------------------------------------|--------------|------|--------------|------|--------------|------|
|                   |                                   |                                          | mean         | sem  | mean         | sem  | mean         | sem  |
| PC(16:0/14:0)     | PC 30:0                           | <b>706.5</b>                             | <b>1.82</b>  | 0.17 | <b>1.82</b>  | 0.04 | <b>1.59</b>  | 0.22 |
| PC(15:0/16:1)     | PC 31:1                           | <b>718.5</b>                             | <b>0.15</b>  | 0.02 | <b>0.18</b>  | 0.01 | <b>0.16</b>  | 0.04 |
| PC(16:0p/16:0)    | PlsC 32:0                         | <b>720.5</b>                             | <b>0.35</b>  | 0.05 | <b>0.38</b>  | 0.01 | <b>0.31</b>  | 0.06 |
| PC(15:0/16:0)     | PC 31:0                           | <b>730.5</b>                             | <b>0.10</b>  | 0.02 | <b>0.12</b>  | 0.01 | <b>0.08*</b> | 0.01 |
| PC(16:1/16:1)     | PC 32:2                           | <b>730.5</b>                             | <b>0.10</b>  | 0.02 | <b>0.12</b>  | 0.01 | <b>0.08*</b> | 0.01 |
| PC(16:0/16:1)     | PC 32:1                           | <b>732.5</b>                             | <b>3.50</b>  | 0.32 | <b>3.72</b>  | 0.07 | <b>3.43</b>  | 0.27 |
| PC(16:0/16:0)     | PC 32:0                           | <b>734.6</b>                             | <b>25.28</b> | 0.43 | <b>25.49</b> | 0.25 | <b>25.36</b> | 3.43 |
| PC(17:1/16:0)     | PC 33:1                           | <b>746.6</b>                             | <b>0.71</b>  | 0.08 | <b>0.71</b>  | 0.01 | <b>0.72</b>  | 0.04 |
|                   | PlsC 34:0                         |                                          |              |      |              |      |              |      |
| PC(16:1/18:1)     | PC 34:2                           | <b>758.6</b>                             | <b>1.62</b>  | 0.09 | <b>1.51</b>  | 0.06 | <b>1.45*</b> | 0.09 |
| PC(16:0/18:1)     | PC 34:1                           | <b>760.6</b>                             | <b>33.03</b> | 0.67 | <b>32.71</b> | 0.22 | <b>32.56</b> | 1.18 |
| PC(16:0p/20:4)    | PlsC 36:4                         | <b>766.6</b>                             | <b>0.41</b>  | 0.05 | <b>0.42</b>  | 0.07 | <b>0.46</b>  | 0.12 |
| PC(19:1/16:0)     | PC 35:1                           | <b>774.6</b>                             | <b>0.29</b>  | 0.04 | <b>0.25</b>  | 0.03 | <b>0.29</b>  | 0.08 |
| PC(16:0/20:4)     | PC 36:4                           | <b>782.6</b>                             | <b>5.33</b>  | 0.27 | <b>6.08*</b> | 0.10 | <b>4.72</b>  | 0.66 |
| PC(18:2/18:2)     |                                   |                                          |              |      |              |      |              |      |
| PC(18:1/18:2)     | PC 36:3                           | <b>784.6</b>                             | <b>0.65</b>  | 0.07 | <b>0.59</b>  | 0.03 | <b>0.78</b>  | 0.11 |
| PC(16:0/20:3)     |                                   |                                          |              |      |              |      |              |      |
| PC(18:1/18:1)     | PC 36:2                           | <b>786.6</b>                             | <b>2.77</b>  | 0.15 | <b>2.67</b>  | 0.04 | <b>2.74</b>  | 0.20 |
| PC(18:0/18:1)     | PC 36:1                           | <b>788.6</b>                             | <b>8.11</b>  | 0.29 | <b>7.70*</b> | 0.04 | <b>8.70*</b> | 0.63 |
| PC(16:0p/22:6)    | PlsC 38:6                         | <b>790.6</b>                             | <b>0.20</b>  | 0.10 | <b>0.19</b>  | 0.04 | <b>0.23</b>  | 0.07 |
| PC(16:1/22:6)     | PC 38:7                           | <b>804.5</b>                             | <b>0.11</b>  | 0.01 | <b>0.09</b>  | 0.01 | <b>0.13</b>  | 0.03 |
| PC(16:0/22:6)     | PC 38:6                           | <b>806.6</b>                             | <b>3.82</b>  | 0.24 | <b>2.01*</b> | 0.10 | <b>4.51*</b> | 0.36 |
| PC(18:1/20:4)     | PC 38:5                           | <b>808.6</b>                             | <b>1.87</b>  | 0.14 | <b>3.69*</b> | 0.09 | <b>1.68</b>  | 0.29 |
| PC(18:0/20:4)     |                                   |                                          |              |      |              |      |              |      |
| PC(16:0/22:4)     | PC 38:4                           | <b>810.6</b>                             | <b>5.58</b>  | 0.33 | <b>6.06*</b> | 0.05 | <b>5.50</b>  | 0.79 |
| PC(20:1/18:1)     | PC 38:2                           | <b>814.6</b>                             | <b>0.49</b>  | 0.04 | <b>0.48</b>  | 0.03 | <b>0.45*</b> | 0.01 |
| PC(18:0/20:1)     | PC 38:1                           | <b>816.5</b>                             | <b>0.29</b>  | 0.04 | <b>0.25</b>  | 0.01 | <b>0.26</b>  | 0.09 |
| PC(20:4/20:4)     | PC 40:8                           | <b>830.6</b>                             | <b>0.08</b>  | 0.01 | <b>0.08</b>  | 0.01 | <b>0.07</b>  | 0.03 |
| PC(18:1/22:6)     | PC 40:7                           | <b>832.6</b>                             | <b>0.83</b>  | 0.09 | <b>0.49*</b> | 0.02 | <b>0.87</b>  | 0.12 |
| PC(18:0/22:6)     | PC 40:6                           | <b>834.6</b>                             | <b>1.87</b>  | 0.12 | <b>1.45*</b> | 0.03 | <b>2.31*</b> | 0.33 |
| PC(18:0/22:4)     | PC 40:4                           | <b>838.6</b>                             | <b>0.49</b>  | 0.06 | <b>0.65*</b> | 0.03 | <b>0.42*</b> | 0.03 |
| PC(20:4/22:6)     | PC 42:10                          | <b>854.6</b>                             | <b>0.07</b>  | 0.02 | <b>0.04</b>  | 0.01 | <b>0.09</b>  | 0.03 |
| PC(22:4/20:4)     | PC 42:8                           | <b>858.6</b>                             | <b>0.07</b>  | 0.02 | <b>0.09*</b> | 0.01 | <b>0.02*</b> | 0.00 |
| PC(18:1/24:0)     | PC 42:1                           | <b>872.7</b>                             | <b>0.05</b>  | 0.01 | <b>0.03</b>  | 0.01 | <b>0.05</b>  | 0.02 |
| PC(22:6/22:6)     | PC 44:12                          | <b>878.6</b>                             | <b>0.04</b>  | 0.02 | <b>0.02*</b> | 0.01 | <b>0.06</b>  | 0.02 |
| PC(22:5/22:6)     | PC44:11                           | <b>880.6</b>                             | <b>0.01</b>  | 0.01 | <b>0.03*</b> | 0.01 | <b>0.01</b>  | 0.01 |



**Table S8:** Concentrations of individual molecular species of PE in the offspring olfactory bulb (% of total PE + PlsE). Data are expressed as the mean  $\pm$  s.e.m. (n= 6 mice/group). \*: Values are significantly different from the control group CON (Mann-Whitney U test;  $p < 0.05$ ).

| Molecular species | PE/PlsE species (sum composition) | PE: neutral loss m/z 141<br>PlsE: MRM transition | CON           |         | LOW           |             | HIGH          |             |
|-------------------|-----------------------------------|--------------------------------------------------|---------------|---------|---------------|-------------|---------------|-------------|
|                   |                                   |                                                  | mean          | sem     | mean          | sem         | mean          | sem         |
|                   |                                   |                                                  | PE(15:0/15:0) | PE 30:0 | 664.5         | <b>0.01</b> | 0.01          | <b>0.01</b> |
| PE(16:0/16:1)     | PE 32:1                           | 690.5                                            | <b>0.12</b>   | 0.03    | <b>0.10</b>   | 0.02        | <b>0.13</b>   | 0.05        |
| PE(16:0/16:0)     | PE 32:0                           | 692.5                                            | <b>0.16</b>   | 0.07    | <b>0.23</b>   | 0.04        | <b>0.17</b>   | 0.04        |
| PE(16:1/18:1)     | PE 34:2                           | 716.5                                            | <b>0.45</b>   | 0.05    | <b>0.36*</b>  | 0.08        | <b>0.51</b>   | 0.10        |
| PE(16:0/18:1)     | PE 34:1                           | 718.5                                            | <b>5.16</b>   | 0.27    | <b>4.70*</b>  | 0.12        | <b>4.78</b>   | 0.46        |
| PE(18:0/16:0)     | PE 34:0                           | 720.6                                            | <b>0.83</b>   | 0.09    | <b>0.76</b>   | 0.10        | <b>0.78</b>   | 0.09        |
| PE(16:1/20:4)     | PE 36:5                           | 738.5                                            | <b>0.13</b>   | 0.04    | <b>0.16</b>   | 0.05        | <b>0.20</b>   | 0.07        |
| PE(16:0/20:4)     | PE 36:4                           | 740.5                                            | <b>3.26</b>   | 0.27    | <b>3.85*</b>  | 0.26        | <b>2.89*</b>  | 0.17        |
| PE(18:1/18:2)     | PE 36:3                           | 742.5                                            | <b>0.40</b>   | 0.12    | <b>0.36</b>   | 0.11        | <b>0.60*</b>  | 0.12        |
| PE(18:1/18:1)     | PE 36:2                           | 744.6                                            | <b>4.67</b>   | 0.40    | <b>3.79*</b>  | 0.21        | <b>5.31*</b>  | 0.30        |
| PE(18:0/18:1)     | PE 36:1                           | 746.6                                            | <b>3.33</b>   | 0.24    | <b>3.35</b>   | 0.39        | <b>3.38</b>   | 0.32        |
| PE(16:1/22:6)     | PE 38:7                           | 762.5                                            | <b>0.41</b>   | 0.08    | <b>0.28*</b>  | 0.05        | <b>0.38</b>   | 0.10        |
| PE(16:0/22:6)     | PE 38:6                           | 764.5                                            | <b>13.43</b>  | 0.77    | <b>7.54*</b>  | 0.95        | <b>15.01*</b> | 1.10        |
| PE(18:1/20:4)     | PE38:5                            | 766.5                                            | <b>3.35</b>   | 0.19    | <b>10.08*</b> | 0.96        | <b>2.80</b>   | 0.52        |
| PE(18:0/20:4)     | PE 38:4                           | 768.6                                            | <b>20.54</b>  | 0.92    | <b>21.51</b>  | 0.90        | <b>17.98*</b> | 0.67        |
| PE(20:1/18:1)     | PE 38:2                           | 772.6                                            | <b>0.14</b>   | 0.09    | <b>0.05</b>   | 0.05        | <b>0.17</b>   | 0.16        |
| PE(18:0/20:1)     |                                   |                                                  |               |         |               |             |               |             |
| PE(20:0/18:1)     | PE 38:1                           | 774.6                                            | <b>0.45</b>   | 0.08    | <b>0.33</b>   | 0.14        | <b>0.46</b>   | 0.16        |
| PE(18:2/22:6)     | PE 40:8                           | 788.5                                            | <b>0.34</b>   | 0.10    | <b>0.41</b>   | 0.10        | <b>0.32</b>   | 0.08        |
| PE(18:1/22:6)     | PE 40:7                           | 790.5                                            | <b>3.98</b>   | 0.28    | <b>2.66*</b>  | 0.13        | <b>4.74*</b>  | 0.19        |
| PE(18:0/22:6)     | PE 40:6                           | 792.6                                            | <b>24.09</b>  | 0.48    | <b>13.98*</b> | 0.95        | <b>26.24*</b> | 0.57        |
| PE(18:0/22:5)     | PE 40:5                           | 794.6                                            | <b>1.29</b>   | 0.46    | <b>10.17*</b> | 0.81        | <b>0.77</b>   | 0.36        |
| PE(18:0/22:4)     | PE 40:4                           | 796.6                                            | <b>3.00</b>   | 0.44    | <b>3.62*</b>  | 0.23        | <b>2.53*</b>  | 0.35        |
| PE(20:4/22:6)     | PE 42:10                          | 812.5                                            | <b>0.25</b>   | 0.07    | <b>0.13*</b>  | 0.05        | <b>0.21</b>   | 0.06        |
| PE(22:4/20:4)     | PE 42:8                           | 816.6                                            | <b>0.30</b>   | 0.06    | <b>0.48*</b>  | 0.13        | <b>0.20*</b>  | 0.03        |
| PE(24:5/18:0)     | PE 42:5                           | 822.6                                            | <b>0.12</b>   | 0.06    | <b>0.29*</b>  | 0.11        | <b>0.09</b>   | 0.04        |
| PE(24:4/18:0)     | PE 42:4                           | 824.6                                            | <b>0.14</b>   | 0.06    | <b>0.21</b>   | 0.09        | <b>0.17</b>   | 0.05        |
| PE(22:6/22:6)     | PE 44:12                          | 836.5                                            | <b>0.17</b>   | 0.04    | <b>0.05*</b>  | 0.03        | <b>0.25</b>   | 0.07        |
| PE(22:5/22:6)     | PE 44:11                          | 838.5                                            | <b>0.05</b>   | 0.03    | <b>0.12*</b>  | 0.02        | <b>0.12*</b>  | 0.06        |
| PE(22:4/22:6)     | PE 44:10                          | 840.6                                            | <b>0.80</b>   | 0.15    | <b>0.70</b>   | 0.16        | <b>0.72</b>   | 0.10        |
| PE(16:0p/20:4)    | 160p/20:4                         | 722 ->303                                        | <b>1.43</b>   | 0.07    | <b>1.89*</b>  | 0.15        | <b>1.17*</b>  | 0.09        |
| PE(16:0p/20:3)    | 160p/20:3                         | 724 ->305                                        | <b>0.11</b>   | 0.01    | <b>0.14*</b>  | 0.02        | <b>0.09*</b>  | 0.01        |
| PE(18:0p/18:1)    | 180p/18:1                         | 728 ->281                                        | <b>0.89</b>   | 0.44    | <b>0.80</b>   | 0.07        | <b>1.08</b>   | 0.09        |
| PE(16:0p/22:6)    | 160p/22:6                         | 746 ->327                                        | <b>1.25</b>   | 0.07    | <b>0.74*</b>  | 0.06        | <b>1.39</b>   | 0.13        |
| PE(18:1p/20:4)    | 181p/20:4                         | 748 -> 303                                       | <b>0.61</b>   | 0.006   | <b>0.86*</b>  | 0.037       | <b>0.48*</b>  | 0.013       |
| PE(16:0p/22:5)    | 160p/22:5                         | 748 -> 329                                       | <b>0.23</b>   | 0.005   | <b>1.05*</b>  | 0.043       | <b>0.21</b>   | 0.009       |
| PE(18:0p/20:4)    | 180p/20:4                         | 750 -> 303                                       | <b>1.55</b>   | 0.017   | <b>1.69</b>   | 0.072       | <b>1.31*</b>  | 0.035       |
| PE(16:0p/22:4)    | 160p/22:4                         | 750 -> 331                                       | <b>1.30</b>   | 0.018   | <b>1.82*</b>  | 0.083       | <b>0.96*</b>  | 0.030       |
| PE(18:1p/22:6)    | 181p/22:6                         | 772 -> 327                                       | <b>0.36</b>   | 0.010   | <b>0.20*</b>  | 0.008       | <b>0.39</b>   | 0.014       |
| PE(18:0p/22:6)    | 180p/22:6                         | 774 -> 327                                       | <b>0.92</b>   | 0.008   | <b>0.50*</b>  | 0.021       | <b>0.99*</b>  | 0.022       |

**Table S9:** Concentrations of individual molecular species of PI in the offspring olfactory bulb (% of total PI). Data are expressed as the mean  $\pm$  s.e.m. (n= 6 mice/group). \*: Values are significantly different from the control group CON (Mann-Whitney U test; p < 0.05).

| Molecular species | PI species (sum composition) | Ion precursor m/z 271 (InsP-H <sub>2</sub> O) [M-H] <sup>-</sup> | CON          |      | LOW          |      | HIGH         |      |
|-------------------|------------------------------|------------------------------------------------------------------|--------------|------|--------------|------|--------------|------|
|                   |                              |                                                                  | mean         | sem  | mean         | sem  | mean         | sem  |
| PI(16:0/16:0)     | PI 32:0                      | 809.5                                                            | <b>3.44</b>  | 0.56 | <b>4.02</b>  | 0.59 | <b>4.29</b>  | 0.22 |
| PI(16:1/18:1)     | PI 34:2                      | 833.5                                                            | <b>0.09</b>  | 0.04 | <b>0.14</b>  | 0.04 | <b>0.08</b>  | 0.04 |
| PI(16:0/18:1)     | PI 34:1                      | 835.5                                                            | <b>1.47</b>  | 0.15 | <b>2.24*</b> | 0.20 | <b>1.71</b>  | 0.33 |
| PI(18:0/16:0)     | PI 34:0                      | 837.5                                                            | <b>4.48</b>  | 0.45 | <b>5.30</b>  | 0.41 | <b>4.76</b>  | 0.65 |
| PI(16:2/20:4)     | PI 36:6                      | 853.5                                                            | <b>0.01</b>  | 0.01 | <b>0.00</b>  | 0.00 | <b>0.01</b>  | 0.01 |
| PI(16:0/20:5)     | PI 36:5                      | 855.5                                                            | <b>0.13</b>  | 0.04 | <b>0.11</b>  | 0.04 | <b>0.38*</b> | 0.06 |
| PI(16:0/20:4)     | PI 36:4                      | 857.5                                                            | <b>11.25</b> | 0.67 | <b>10.91</b> | 0.28 | <b>11.69</b> | 0.81 |
| PI(18:0/18:1)     | PI 36:1                      | 863.6                                                            | <b>0.46</b>  | 0.14 | <b>0.33</b>  | 0.08 | <b>0.63</b>  | 0.19 |
| PI(17:0/20:4)     | PI 37:4                      | 871.5                                                            | <b>0.51</b>  | 0.13 | <b>0.51</b>  | 0.16 | <b>0.32</b>  | 0.14 |
| PI(16:1/22:6)     | PI 38:7                      | 879.5                                                            | <b>0.02</b>  | 0.01 | <b>0.02</b>  | 0.02 | <b>0.10</b>  | 0.06 |
| PI(16:0/22:6)     | PI 38:6                      | 881.5                                                            | <b>3.65</b>  | 0.13 | <b>1.53*</b> | 0.35 | <b>3.89</b>  | 0.36 |
| PI(18:1/20:4)     | PI 38:5                      | 883.5                                                            | <b>8.50</b>  | 0.68 | <b>9.66</b>  | 0.73 | <b>7.68</b>  | 0.43 |
| PI(18:0/20:5)     |                              |                                                                  |              |      |              |      |              |      |
| PI(18:0/20:4)     | PI 38:4                      | 885.5                                                            | <b>56.52</b> | 0.94 | <b>56.79</b> | 0.71 | <b>54.13</b> | 1.37 |
| PI(20:4/20:4)     | PI 40:8                      | 905.5                                                            | <b>0.10</b>  | 0.03 | <b>0.12</b>  | 0.04 | <b>0.14</b>  | 0.05 |
| PI(18:1/22:6)     | PI 40:7                      | 907.5                                                            | <b>0.45</b>  | 0.14 | <b>0.27</b>  | 0.09 | <b>0.23</b>  | 0.10 |
| PI(18:0/22:6)     | PI 40:6                      | 909.5                                                            | <b>7.95</b>  | 0.47 | <b>4.18*</b> | 0.28 | <b>9.09</b>  | 0.69 |
| PI(18:0/22:5)     | PI 40:5                      | 911.6                                                            | <b>0.59</b>  | 0.21 | <b>3.08*</b> | 0.23 | <b>0.26</b>  | 0.17 |
| PI(18:0/22:4)     | PI 40:4                      | 913.6                                                            | <b>0.38</b>  | 0.14 | <b>0.80</b>  | 0.23 | <b>0.61</b>  | 0.31 |

**Table S10:** Concentrations of individual molecular species of PS in the offspring olfactory bulb (% of total PS). Data are expressed as the mean  $\pm$  s.e.m. (n= 6 mice/group). \*: Values are significantly different from the control group CON (Mann-Whitney U test; p < 0.05).

| Molecular species    | PS species (sum composition) | Neutral loss <i>m/z</i> 185 [M+H] <sup>+</sup> | CON          |      | LOW           |      | HIGH         |      |
|----------------------|------------------------------|------------------------------------------------|--------------|------|---------------|------|--------------|------|
|                      |                              |                                                | mean         | sem  | mean          | sem  | mean         | sem  |
| <b>PS(16:0/18:1)</b> | PS 34:1                      | 762.5                                          | <b>9.53</b>  | 0.78 | <b>7.10</b>   | 1.47 | <b>9.54</b>  | 1.07 |
| <b>PS(18:0/17:0)</b> | PS 35:0                      | 778.6                                          | <b>0.13</b>  | 0.09 | <b>0.23</b>   | 0.14 | <b>0.20</b>  | 0.10 |
| <b>PS(18:1/18:1)</b> | PS 36:2                      | 788.5                                          | <b>10.05</b> | 1.85 | <b>8.97</b>   | 2.44 | <b>11.41</b> | 1.28 |
| <b>PS(18:0/18:1)</b> | PS 36:1                      | 790.6                                          | <b>17.31</b> | 3.41 | <b>19.94</b>  | 3.45 | <b>18.51</b> | 1.75 |
| <b>PS(16:0/20:1)</b> |                              |                                                |              |      |               |      |              |      |
| <b>PS(15:1/22:4)</b> | PS 37:5                      | 796.5                                          | <b>0.04</b>  | 0.01 | <b>0.02*</b>  | 0.00 | <b>0.04</b>  | 0.02 |
| <b>PS(16:0/22:6)</b> | PS 38:6                      | 808.5                                          | <b>10.35</b> | 2.34 | <b>4.93</b>   | 1.41 | <b>8.77</b>  | 1.97 |
| <b>PS(18:0/20:3)</b> | PS 38:3                      | 814.6                                          | <b>2.16</b>  | 0.88 | <b>0.10*</b>  | 0.05 | <b>0.36*</b> | 0.30 |
| <b>PS(18:0/22:6)</b> | PS 40:6                      | 836.5                                          | <b>44.10</b> | 3.32 | <b>28.57*</b> | 1.92 | <b>42.24</b> | 3.24 |
| <b>PS(18:0/22:5)</b> | PS 40:5                      | 838.6                                          | <b>2.05</b>  | 1.38 | <b>22.77*</b> | 4.01 | <b>3.40</b>  | 1.92 |
| <b>PS(18:0/22:4)</b> | PS 40:4                      | 840.6                                          | <b>4.26</b>  | 0.92 | <b>7.37</b>   | 2.54 | <b>5.53</b>  | 1.89 |

**Table S11:** Concentrations of individual molecular species of SM in the offspring olfactory bulb (% of total SM). Data are expressed as the mean  $\pm$  s.e.m. (n= 6 mice/group). \*: Values are significantly different from the control group CON (Mann-Whitney U test;  $p < 0.05$ ).

| Molecular species     | SM species (sum composition) | Ion precursor $m/z$ 184 [M+H] <sup>+</sup> | CON          |      | LOW          |      | HIGH         |      |
|-----------------------|------------------------------|--------------------------------------------|--------------|------|--------------|------|--------------|------|
|                       |                              |                                            | mean         | sem  | mean         | sem  | mean         | sem  |
| <b>SM(d18:1/16:0)</b> | SM 34:1                      | 706.5                                      | <b>15.57</b> | 0.55 | <b>18.23</b> | 2.20 | <b>15.46</b> | 2.81 |
| <b>SM(d18:2/18:0)</b> | SM 36:2                      | 730.5                                      | <b>1.13</b>  | 0.15 | <b>1.17</b>  | 0.36 | <b>1.39</b>  | 0.22 |
| <b>SM(d18:0/18:1)</b> | SM 36:1                      | 732.5                                      | <b>63.07</b> | 0.77 | <b>61.72</b> | 2.55 | <b>67.34</b> | 3.07 |
| <b>SM(d15:0/23:1)</b> | SM 38:1                      | 754.5                                      | <b>3.31</b>  | 0.16 | <b>3.35</b>  | 0.52 | <b>2.63*</b> | 0.22 |
| <b>SM(d25:0/15:1)</b> | SM 40:1                      | 768.5                                      | <b>3.65</b>  | 0.31 | <b>3.38</b>  | 0.46 | <b>2.74</b>  | 0.44 |
| <b>SM(d18:1/24:2)</b> | SM 42:3                      | 784.6                                      | <b>0.78</b>  | 0.10 | <b>0.72</b>  | 0.16 | <b>0.53</b>  | 0.11 |
| <b>SM(d18:1/24:1)</b> | SM 42:2                      | 786.6                                      | <b>10.10</b> | 0.47 | <b>9.26</b>  | 0.62 | <b>7.32*</b> | 0.73 |
| <b>SM(d18:1/24:0)</b> | SM 42:1                      | 788.6                                      | <b>2.39</b>  | 0.41 | <b>2.17</b>  | 0.52 | <b>2.59</b>  | 0.55 |

**Table S12:** Concentrations of individual molecular species of LPC in the offspring olfactory bulb (% of total LPC). Data are expressed as the mean  $\pm$  s.e.m. (n= 6 mice/group). \*: Values are significantly different from the control group CON (Mann-Whitney U test;  $p < 0.05$ ).

| Molecular species | Ion precursor<br>m/z 184<br>[M+H] <sup>+</sup> | CON          |      | LOW           |      | HIGH         |      |
|-------------------|------------------------------------------------|--------------|------|---------------|------|--------------|------|
|                   |                                                | mean         | sem  | mean          | sem  | mean         | sem  |
| LPC(16:1)         | 494.3                                          | <b>0.56</b>  | 0.19 | <b>0.69</b>   | 0.23 | <b>0.74</b>  | 0.28 |
| LPC(16:0)         | 496.3                                          | <b>58.57</b> | 1.06 | <b>57.02</b>  | 2.77 | <b>52.27</b> | 2.57 |
| LPC(18:2)         | 520.3                                          | <b>0.30</b>  | 0.14 | <b>1.06</b>   | 0.35 | <b>1.15</b>  | 0.55 |
| LPC(18:1)         | 522.4                                          | <b>16.11</b> | 0.96 | <b>14.16</b>  | 1.26 | <b>16.86</b> | 0.53 |
| LPC(18:0)         | 524.4                                          | <b>14.38</b> | 0.78 | <b>19.24*</b> | 1.61 | <b>14.60</b> | 2.15 |
| LPC(20:4)         | 544.3                                          | <b>5.89</b>  | 1.03 | <b>6.10</b>   | 0.85 | <b>7.89</b>  | 1.24 |
| LPC(22:6)         | 568.3                                          | <b>3.85</b>  | 0.48 | <b>1.25*</b>  | 0.29 | <b>6.13</b>  | 0.99 |
| LPC(22:4)         | 572.4                                          | <b>0.34</b>  | 0.15 | <b>0.49</b>   | 0.12 | <b>0.36</b>  | 0.15 |
